# Supplementary material for: Knockdown of METTL14 suppresses the malignant progression of non-small cell lung cancer by reducing Twist expression
Source: PubMed Central journal article supplement — Oncol Lett. 2021 Oct 21;22(6):847. doi: 10.3892/ol.2021.13108 (PMC8561617; doi:10.3892/ol.2021.13108), 2021-10-21

Figure S1. Expression levels of METTL14 in 64 patients with non-metastatic NSCLC and 335 patients with metastatic NSCLC based on The Cancer Genome Atlas database. The data were analyzed using the Mann-Whitney U test. METTL14, methyltransferase-like 14; NSCLC, non-small cell lung cancer.

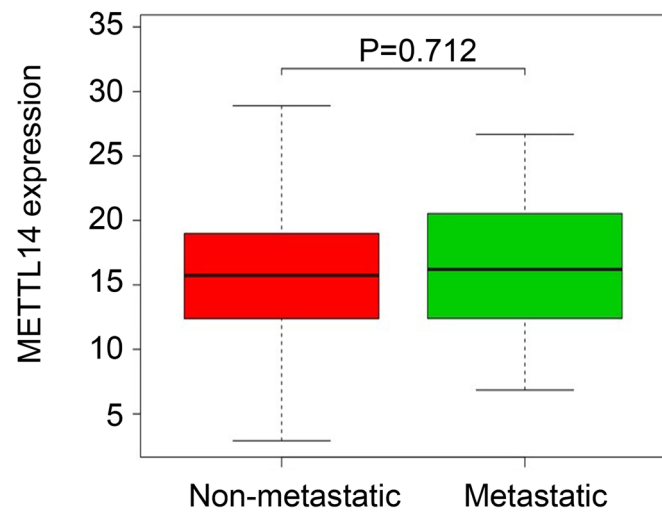

Supplement: Supplementary_Data.pdf [file Supplementary_Data.pdf]
